# Supplementary material
Source: MDPI journal article supplement (https://www.mdpi.com/2077-0472/11/12/1286)
Supplement: s1 [file s1]

## Supplementary materials

### **Multiplex CRISPR/Cas9 Mutagenesis of *BrVRN1* Delays Flowering Time in Chinese Cabbage (*Brassica rapa* L. ssp. *pekinensis*)**

Joon Ki Hong, Eun Jung Suh, Sang-Ryeol Park, Jihee Park, Yeon-Hee Lee\*

Agricultural Biotechnology Department, National Institute of Agricultural Sciences, Rural Development Administration, 370 Nongsaengmyeong-ro, Jeonju 54874, Korea;  
jkhongok@korea.kr (J.K.H); seji00@korea.kr (E.J.S); srpark@korea.kr (S.-R.P);  
heeya91@korea.kr (J.P)

\* Correspondence: yhl2222@korea.kr (Y.-H.L); Tel.: +82-63-238-4690 (Y.-H.L)

```

Bra022376 : ATGCCACGCCCTTCTTCCACAAGTTGATTTCTCATCCACTATCCAAGAAAACGCCCTGAGAGTTCAGATAAGTTTGTGAGTAATTTC : 90
Bra037544 : .....C.....T.....A... : 90
Bra001729 : .....G..T..A.....GA... : 90

                                gRNA1
Bra022376 : AAGGACGAGCTATCCGTAGCAGTTGCACTCACAGTACCTCATGGTCACGTTTGGCGTGTAGGACTAAGAAAATCCGACAACAACA---AA : 177
Bra037544 : ....GG.....G..T.....T.....A...G.....T..G...T...A----- : 177
Bra001729 : .....G..T.....C.....T.....G...G..T.....ACA.G : 180

                                gRNA2
Bra022376 : ATCTACTTTCAGATGGTTGGCAAGAGTTTGTGACCGTTACTCAATCCGCATTGGCTATCTTCTCATCTTCAGATACGAAGGCAACTCT : 267
Bra037544 : ....GG.....T.....C...T.G..T..T..... : 267
Bra001729 : ..T.GG.....T.....C.....T..C...T.G...T..... : 270

                                gRNA3
Bra022376 : CTCAAACGCGCCCGTTTGTGTTGAAGATCTTGAAGACGAGACGCCCGGAGGTTGTTTATCCTTCTTTCAGTGTATCCGTCATCACA : 441
Bra037544 : T.....T..G.....C..C...T...T..TT-----C.....G-----T... : 429
Bra001729 : T.....TC.....C.....T...T..T-----AC.C.GC.CA.AA.CG- : 425

                                gRNA4
Bra022376 : CAGCATCCTGAAGTTACTGTGGC-CGCTATTAAGGGTACGCTAGTCCAGCTATCCAGAGCTTCTTCGCTGGACCACCTGTAAAGCTGA : 530
Bra037544 : .....GAC.....A.....A.....C.TA...T.....A..... : 515
Bra001729 : -----GAC.....T...C.....A.....C..... : 467

Bra022376 : AGAGGCGACACCAACTC-----CTAAAGTTACTAAGAAGAGAGGGAGGAAGAAGAACGCTGT---TCCTGAGGAAGTAACTCATC : 611
Bra037544 : ....A.A.....C-----A.....C...A.....A---.....A...T.... : 596
Bra001729 : .....A.....A.AACCT.A.....C...A.....T...ATCA..... : 557

Bra022376 : TGCTCCGAGGGATGATGACCCGGAGAGCCGTTCAAAGTTCTACGAGAGTGCTTCTGCGAGAAGAGAACGGTGACTGCAGAGAGAGAGA : 701
Bra037544 : ....AC.A...C...A...A.....T.....A.....C.....G..A.... : 686
Bra001729 : ..A...A.....A.....A.....A.....A...T..... : 647

Bra022376 : GAGAGCCATCAATGCAGCTAAACGTTTCGAGCCAACGAACCCCTTCTTCAGAGTTGTTCTCCGACCATCTTATCTATACAGAGGCTGCAT : 791
Bra037544 : .....C.....A.....A.....C.....T..... : 776
Bra001729 : ..G..TG.T.....C.....T.....A.....GA...G.....T..... : 737

Bra022376 : CATGTATCTGCCTTCTGGATTGCTGAGAGTACTTAAAGTGGGATCTCGGGATTCATCAAGGTCCAGCTCGGGGAGAAACAGTGGCCAGT : 881
Bra037544 : .....G..A..G.....T...C..... : 866
Bra001729 : .....T.....T.....A.....A.....T... : 827

Bra022376 : GAGATGCCTCTACAAAGCAGGGAGAGCCAAGTTCAGCCAGGATGGTACGAGTTCACCTCTGGAGAACACCTAGGAGAGAGGTGACGCTCTG : 971
Bra037544 : ..G.....T.....T.....G.....T..... : 956
Bra001729 : .....A.....T.....T...T...T.....G...T.....T..... : 917

Bra022376 : CGTGTTCCGAGCTCCTCAGAACAGAGACTTCGTCCTGAAAGTAAACGGCCTATCGAGTCAAC---TCAATCTAG----- : 1041
Bra037544 : .....G.....T..C...G.....T..T.....GAG.ACG...GA----- : 1029
Bra001729 : .....T.....G..G.....T.....G.....GAG.ATG...GA----- : 990

```

**Figure S1.** Comparison of the nucleotide sequences of three *BrVRN1* genes with target sites of CRISPR/Cas9. The gene accession numbers for these sequences are as follows: Bra022376 (*BrVRN1a*), Bra037544 (*BrVRN1b*), and Bra001729 (*BrVRN1c*). Dots indicate identical sequences. Dashes represent gaps introduced to maximize the alignment.

|              |                                                                                                                                                                                                                                                                                                                                                                                                                                                                                                                                                                                                                                                            |                                                                                                                                                                                                                                                                                                                     |                                                                                                     |
|--------------|------------------------------------------------------------------------------------------------------------------------------------------------------------------------------------------------------------------------------------------------------------------------------------------------------------------------------------------------------------------------------------------------------------------------------------------------------------------------------------------------------------------------------------------------------------------------------------------------------------------------------------------------------------|---------------------------------------------------------------------------------------------------------------------------------------------------------------------------------------------------------------------------------------------------------------------------------------------------------------------|-----------------------------------------------------------------------------------------------------|
| <b>gRNA1</b> |                                                                                                                                                                                                                                                                                                                                                                                                                                                                                                                                                                                                                                                            |                                                                                                                                                                                                                                                                                                                     |                                                                                                     |
| <b>Wt</b>    | TAGCAGTTGCACTCACAGTACCTGATGGTCACGTTTGGCGGTAGGACTAAGAAAAATCCGACA                                                                                                                                                                                                                                                                                                                                                                                                                                                                                                                                                                                            | Target sequence                                                                                                                                                                                                                                                                                                     |                                                                                                     |
|              | <u>Most frequent sequences</u>                                                                                                                                                                                                                                                                                                                                                                                                                                                                                                                                                                                                                             | Type                                                                                                                                                                                                                                                                                                                | Reads                                                                                               |
| <b>#1</b>    | TAGCAGTTGCACTCACAGTACCTGATGGTCACGTTTGGCGGTAGGACTAAGAAAAATCCGACA                                                                                                                                                                                                                                                                                                                                                                                                                                                                                                                                                                                            | Wild-type                                                                                                                                                                                                                                                                                                           | 412113                                                                                              |
| <b>#2</b>    | TAGCAGTTGCACTCACAGTACCTGATGGTCACGTTTGGCGGTAGGACTAAGAAAAATCCGACA<br>TAGCAGTTGCACTCACAGTACCTGATAGGTCACGTTTGGCGGTAGGACTAAGAAAAATCCGACA<br>TAGCAGTTGCACTCACAGTACCTGAT----ACGTTTGGCGGTAGGACTAAGAAAAATCCGACA                                                                                                                                                                                                                                                                                                                                                                                                                                                     | Wild-type<br>1 bp insertion(Out of frame)<br>4 bp deletion(Out of frame)                                                                                                                                                                                                                                            | 325<br>177752<br>366916                                                                             |
| <b>#7</b>    | TAGCAGTTGCACTCACAGTACCTGATGGTCACGTTTGGCGGTAGGACTAAGAAAAATCCGACA<br>TAGCAGTTGCACTCACAGTACCTGATGGTCACGTTTGGCGGTAGGACTAAGAAAAATCCGACA                                                                                                                                                                                                                                                                                                                                                                                                                                                                                                                         | Wild-type<br>1 bp insertion(Out of frame)                                                                                                                                                                                                                                                                           | 681881<br>1229                                                                                      |
| <b>gRNA2</b> |                                                                                                                                                                                                                                                                                                                                                                                                                                                                                                                                                                                                                                                            |                                                                                                                                                                                                                                                                                                                     |                                                                                                     |
| <b>Wt</b>    | ATGGTTGGCAAGAGTTTGTGCACCGTTACTCAATCCGATTGGCTATCTTCTCATCTTCAGAT                                                                                                                                                                                                                                                                                                                                                                                                                                                                                                                                                                                             | Target sequence                                                                                                                                                                                                                                                                                                     |                                                                                                     |
|              | <u>Most frequent sequences</u>                                                                                                                                                                                                                                                                                                                                                                                                                                                                                                                                                                                                                             | Type                                                                                                                                                                                                                                                                                                                | Reads                                                                                               |
| <b>#1</b>    | ATGGTTGGCAAGAGTTTGTGCACCGTTACTCAATCCGATTGGCTATCTTCTCATCTTCAGAT<br>ATGGTTGGCAAGAGTTTGTGCACCGTTACTCAATCCGACATTGGCTATCTTCTCATCTTCAGAT<br>ATGGTTGGCAAGAGTTTGTGCACCGTTACTCAATCC-CATTGGCTATCTTCTCATCTTCAGAT                                                                                                                                                                                                                                                                                                                                                                                                                                                      | Wild-type<br>1 bp insertion(Out of frame)<br>1 bp deletion(Out of frame)                                                                                                                                                                                                                                            | 1468<br>144083<br>165072                                                                            |
| <b>#2</b>    | ATGGTTGGCAAGAGTTTGTGCACCGTTACTCAATCCGATTGGCTATCTTCTCATCTTCAGAT<br>ATGGTTGGCAAGAGTTTGTGCACCGTTACTCAATCCGACATTGGCTATCTTCTCATCTTCAGAT<br>ATGGTTGGCAAGAGTTTGTGCACCGTTACTCAATCCGACATTGGCTATCTTCTCATCTTCAGAT<br>ATGGTTGGCAAGAGTTTGTGCACCGTTACTCAATCCGTCATTGGCTATCTTCTCATCTTCAGAT<br>ATGGTTGGCAAGAGTTTGTGCACCGTTACTCAATCC-CATTGGCTATCTTCTCATCTTCAGAT                                                                                                                                                                                                                                                                                                              | Wild-type<br>1 bp insertion(Out of frame)<br>1 bp insertion(Out of frame)<br>1 bp insertion(Out of frame)<br>1 bp deletion(Out of frame)                                                                                                                                                                            | 114957<br>208846<br>187989<br>42573<br>6108                                                         |
| <b>#7</b>    | ATGGTTGGCAAGAGTTTGTGCACCGTTACTCAATCCGATTGGCTATCTTCTCATCTTCAGAT<br>ATGGTTGGCAAGAGTTTGTGCACCGTTACTCAATCCGTCATTGGCTATCTTCTCATCTTCAGAT<br>ATGGTTGGCAAGAGTTTGTGCACCGTTACTCAATCCGACATTGGCTATCTTCTCATCTTCAGAT<br>ATGGTTGGCAAGAGTTTGTGCACCGTTACTCAATCCGACATTGGCTATCTTCTCATCTTCAGAT                                                                                                                                                                                                                                                                                                                                                                                 | Wild-type<br>1 bp insertion(Out of frame)<br>1 bp insertion(Out of frame)<br>1 bp insertion(Out of frame)                                                                                                                                                                                                           | 297577<br>270036<br>4450<br>2380                                                                    |
| <b>gRNA3</b> |                                                                                                                                                                                                                                                                                                                                                                                                                                                                                                                                                                                                                                                            |                                                                                                                                                                                                                                                                                                                     |                                                                                                     |
| <b>Wt</b>    | TCTTGAAGACGAAGACGCCGCCGAGGTTGTTTATCCTTCTTTCAGTGTATCCGTCATCACA                                                                                                                                                                                                                                                                                                                                                                                                                                                                                                                                                                                              | Target sequence                                                                                                                                                                                                                                                                                                     |                                                                                                     |
|              | <u>Most frequent sequences</u>                                                                                                                                                                                                                                                                                                                                                                                                                                                                                                                                                                                                                             | Type                                                                                                                                                                                                                                                                                                                | Reads                                                                                               |
| <b>#1</b>    | TCTTGAAGACGAAGACGCCGCCGAGGTTGTTTATCCTTCTTTCAGTGTATCCGTCATCACA<br>-----TTGTTTATCCTTCTTTCAGTGTATCCGTCATCACA<br>TCTTGAAGACGAAGACGCCGCCGAGG-TGTTTATCCTTCTTTCAGTGTATCCGTCATCACA<br>-----TTGTTTATCCTTCTTTCAGTGTATCCGTCATCACA<br>TCTTGAAGACGAAGACGCCGCCGAGG-TGTTTATCCTTCTTTCAGTGTATCCGTCATCACA                                                                                                                                                                                                                                                                                                                                                                    | Wild-type<br>6 bp deletion(In frame)<br>1 bp deletion(Out of frame)<br>6 bp deletion(In frame)<br>1 bp deletion(Out of frame)                                                                                                                                                                                       | 1,370<br>263,973<br>143,821<br>1,513<br>1,115                                                       |
| <b>#2</b>    | TCTTGAAGACGAAGACGCCGCCGAGGTTGTTTATCCTTCTTTCAGTGTATCCGTCATCACA<br>TCTTGAAGACGAAGACGCCGCCGAGTTT-----<br>TCTTGAAGACGAAGACGCCGCCGAG--TGTTTATCCTTCTTTCAGTGTATCCGTCATCACA<br>TCTTGAAGACGAAGACGCCGCCGAG-GTTGTTTATCCTTCTTTCAGTGTATCCGTCATCACA<br>TCTTGAAGACGAAGACGCCGCCGAGG-TGTTTATCCTTCTTTCAGTGTATCCGTCATCACA<br>-----TTGTTTATCCTTCTTTCAGTGTATCCGTCATCACA<br>TCTTGAAGACGAAGACGCCGCCGAGGTTGTTTATCCTTCTTTCAGTGTATCCGTCATCACA<br>TCTTGAAGACGAAGACGCCGCCGAG--GTTTATCCTTCTTTCAGTGTATCCGTCATCACA<br>TCTTGAAGACGAAGACGCCGCCGAGG---TTATCCTTCTTTCAGTGTATCCGTCATCACA<br>TCTTGAAGACGAAGACGCCGCCGAGTTT-----<br>TCTTGAAGACGAAGACGCCGCCGAGGATTGTTTATCCTTCTTTCAGTGTATCCGTCATCACA | Wild-type<br>15 bp deletion(In frame)<br>2 bp deletion(Out of frame)<br>1 bp deletion(Out of frame)<br>1 bp deletion(Out of frame)<br>6 bp deletion(In frame)<br>1 bp insertion(Out of frame)<br>3 bp deletion(In frame)<br>4 bp deletion(Out of frame)<br>15 bp deletion(In frame)<br>1 bp insertion(Out of frame) | 375,915<br>110,060<br>26,672<br>13,226<br>6,978<br>5,066<br>3,707<br>1,236<br>1,062<br>1,053<br>561 |
| <b>#7</b>    | TCTTGAAGACGAAGACGCCGCCGAGGTTGTTTATCCTTCTTTCAGTGTATCCGTCATCACA<br>TCTTGAAGACGA-----ACA<br>TCTTGAAGACGAAGACGCCGCCG-----ATCCTTCTTTCAGTGTATCCGTCATCACA<br>TCTTGAAGACGAAGACGCCGCCGAGG-TGTTTATCCTTCTTTCAGTGTATCCGTCATCACA                                                                                                                                                                                                                                                                                                                                                                                                                                        | Wild-type<br>22 bp deletion(Out of frame)<br>9 bp deletion(In frame)<br>1 bp deletion(Out of frame)                                                                                                                                                                                                                 | 18,202<br>290,381<br>128,997<br>12,103                                                              |
| <b>gRNA4</b> |                                                                                                                                                                                                                                                                                                                                                                                                                                                                                                                                                                                                                                                            |                                                                                                                                                                                                                                                                                                                     |                                                                                                     |
| <b>Wt</b>    | ATCCGTCATCACAACAGCATCTGAAGTTACTGTGGCCGCTATTAAAGGGTACGCTAGTCCAG                                                                                                                                                                                                                                                                                                                                                                                                                                                                                                                                                                                             | Target sequence                                                                                                                                                                                                                                                                                                     |                                                                                                     |
|              | <u>Most frequent sequences</u>                                                                                                                                                                                                                                                                                                                                                                                                                                                                                                                                                                                                                             | Type                                                                                                                                                                                                                                                                                                                | Leads                                                                                               |
| <b>#1</b>    | ATCCGTCATCACAACAGCATCTGAAGTTACTGTGGCCGCTATTAAAGGGTACGCTAGTCCAG                                                                                                                                                                                                                                                                                                                                                                                                                                                                                                                                                                                             | Wild-type                                                                                                                                                                                                                                                                                                           | 226,803                                                                                             |
| <b>#2</b>    | ATCCGTCATCACAACAGCATCTGAAGTTACTGTGGCCGCTATTAAAGGGTACGCTAGTCCAG<br>-----GTTACTGTGGCCGCTATTAAAGGGTACGCTAGTCCAG                                                                                                                                                                                                                                                                                                                                                                                                                                                                                                                                               | Wild-type<br>6 bp deletion(In frame)                                                                                                                                                                                                                                                                                | 320,744<br>132,344                                                                                  |
| <b>#7</b>    | ATCCGTCATCACAACAGCATCTGAAGTTACTGTGGCCGCTATTAAAGGGTACGCTAGTCCAG<br>A-----CGCTATTAAAGGGTACGCTAGTCCAG                                                                                                                                                                                                                                                                                                                                                                                                                                                                                                                                                         | Wild-type<br>17 bp deletion(Out of frame)                                                                                                                                                                                                                                                                           | 239,818<br>12,039                                                                                   |

**Figure S2.** Genome-editing analysis of T<sub>0</sub> plants by deep-sequencing. Wt, untransformed wild-type plants; #1, #2, and #7, selected transgenic lines, respectively.

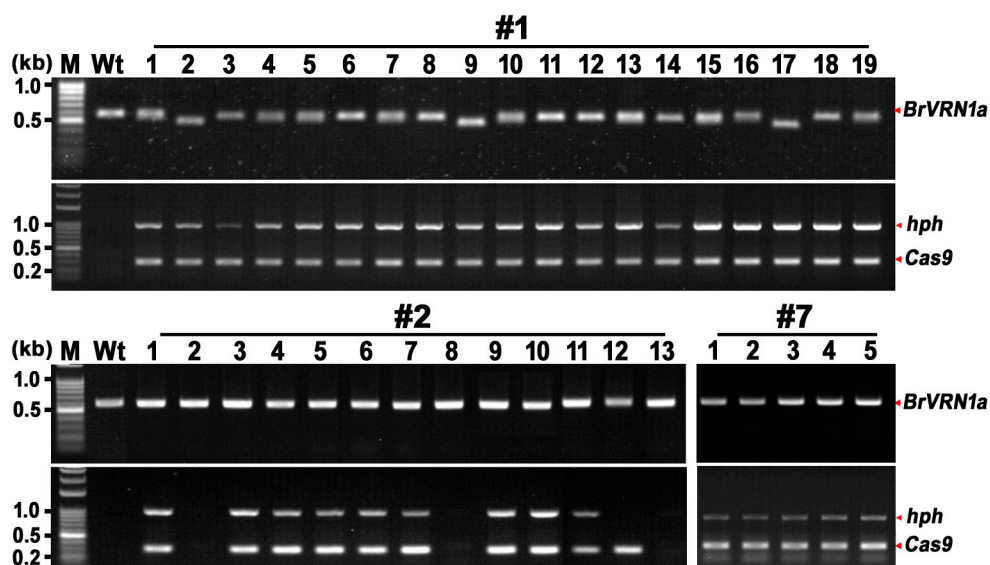

**Figure S3.** The confirmation of the presence of hygromycin resistant gene (*hph*) and *Cas9* transgenes using genomic PCR analysis in T<sub>1</sub> transgenic lines. Wt, untransformed wild-type plants; lane numbers, selected #1, #2, and #7 T<sub>1</sub> transgenic lines, respectively.

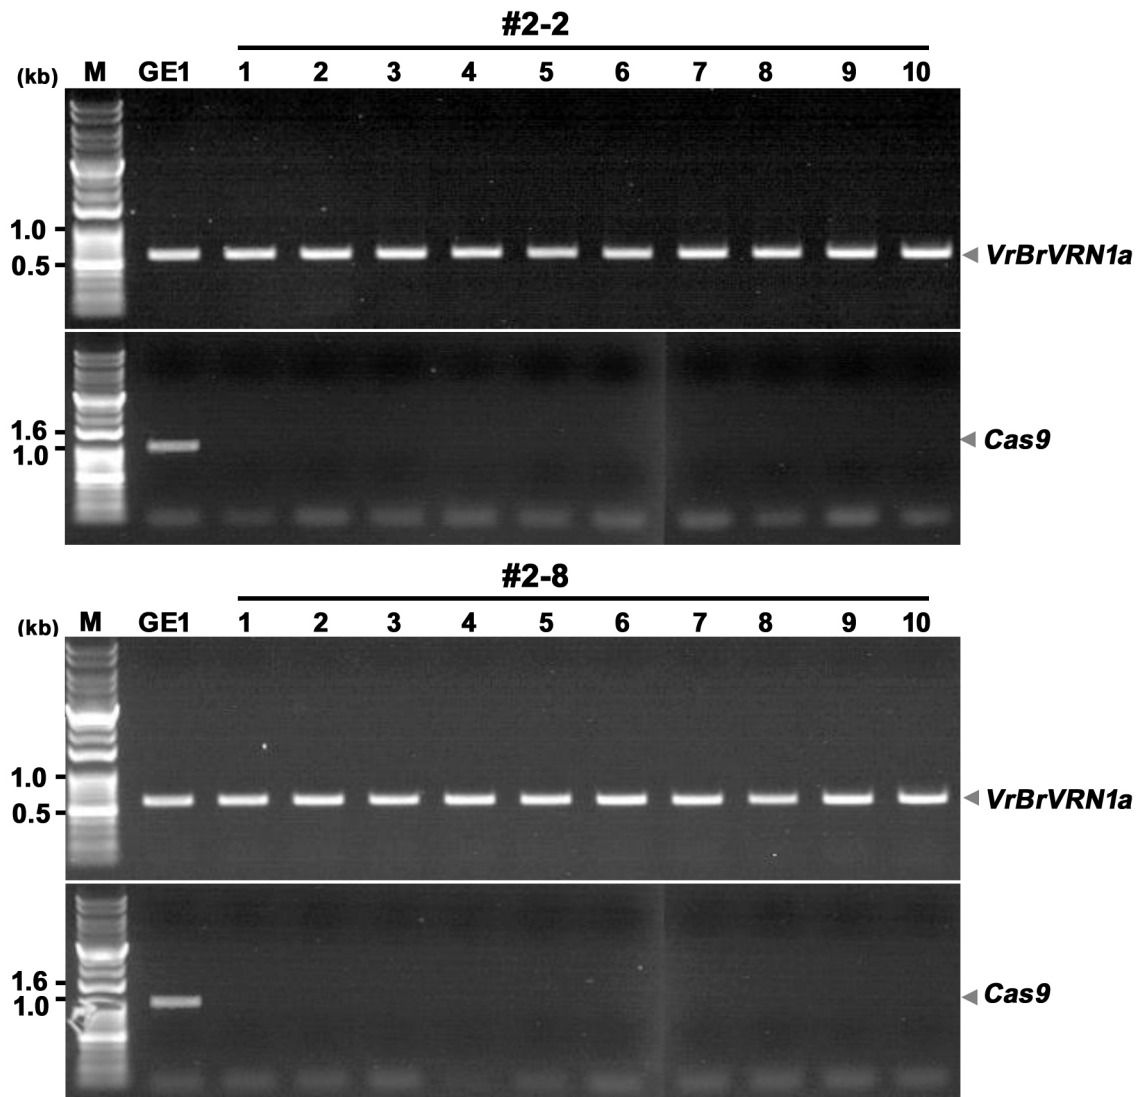

**Figure S4.** The confirmation of the presence of *Cas9* transgenes using genomic PCR analysis in ‘transgene-free’ *BrVRN1* mutant GE2 lines. Wt, untransformed wild-type plants; lanes 1 to 10, selected #2-2 and #2-8 GE2 lines, respectively.



|              |                                                                  |                                |         |
|--------------|------------------------------------------------------------------|--------------------------------|---------|
| <b>gRNA1</b> |                                                                  |                                |         |
| <b>Wt</b>    | TAGCAGTTGCACTCACAGTACCTGATGGTCACGTTTGGCGTGTAGGACTAAGAAAATCCGACA  | Target sequence                |         |
|              | <u>Most frequent sequences</u>                                   | Type                           | Leads   |
| #2-2         | TAGCAGTTGCACTCACAGTACCTGATAGTCACGTTTGGCGTGTAGGACTAAGAAAATCCGACA  | Wild-type(mismatch)            | 10      |
|              | TAGCAGTTGCACTCACAGTACCTGATAGGTCACGTTTGGCGTGTAGGACTAAGAAAATCCGACA | 1 bp insertion(Out of frame)   | 720,101 |
|              | TAGCAGTTGCACTCACAGTACCTGATAGGTCACG-TTGGCGTGTAGGACTAAGAAAATCCGACA | 1 bp ins/1bp del(Out of frame) | 167     |
|              | TAGCAGTTGCACTCACAGTACCTGAT-GTCACGTTTGGCGTGTAGGACTAAGAAAATCCGACA  | 1 bp deletion(Out of frame)    | 2       |
| #2-8         | TAGCAGTTGCACTCACAGTACCTGATGGTCACGTTTGGCGTGTAGGACTAAGAAAATCCGACA  | Wild-type(mismatch)            | 15      |
|              | TAGCAGTTGCACTCACAGTACCTGATAGGTCACGTTTGGCGTGTAGGACTAAGAAAATCCGACA | 1 bp insertion(Out of frame)   | 726,623 |
|              | TAGCAGTTGCACTCACAGTACCTGATAGGTCGCGTTTGGCGTGTAGGACTAAGAAAATCCGACA | 1 bp insertion(Out of frame)   | 3,284   |
|              | TAGCAGTTGCACTCACAGTACCTGATAGGTCACG-TTGGCGTGTAGGACTAAGAAAATCCGACA | 1 bp ins/1bp del(Out of frame) | 132     |
|              | TAGCAGTTGCACTCACAGTACCTGAT---ACGTTTGGCGTGTAGGACTAAGAAAATCCGACA   | 4 bp deletion(Out of frame)    | 92      |
| <b>gRNA2</b> |                                                                  |                                |         |
| <b>Wt</b>    | ATGGTTGGCAAGAGTTTGTGACCGTTACTCAATCCGCATTGGCTATCTTCTCATCTTCAGAT   | Target sequence                |         |
|              | <u>Most frequent sequences</u>                                   | Type                           | Leads   |
| #2-2         | ATGGTTGGCAAGAGTTTGTGACCGTTACTCAATCCGCATTGGCTATCTTCTCATCTTCAGAT   | Wild-type                      | 24      |
|              | ATGGTTGGCAAGAGTTTGTGACCGTTACTCAATCCGCATTGGCTATCTTCTCATCTTCAGAT   | 1 bp insertion(Out of frame)   | 596,480 |
|              | ATGGTTGGCAAGAGTTTGTGACCGTTACTCAATCC-CATTGGCTATCTTCTCATCTTCAGAT   | 1 bp deletion(Out of frame)    | 2       |
| #2-8         | ATGGTTGGCAAGAGTTTGTGACCGTTACTCAATCCGCATTGGCTATCTTCTCATCTTCAGAT   | Wild-type                      | 2       |
|              | ATGGTTGGCAAGAGTTTGTGACCGTTACTCAATCCGCATTGGCTATCTTCTCATCTTCAGAT   | 2 bp deletion(Out of frame)    | 34      |
|              | ATGGTTGGCAAGAGTTTGTGACCGTTACTCAATCCGCATTGGCTATCTTCTCATCTTCAGAT   | 1 bp insertion(Out of frame)   | 613,710 |
|              | ATGGTTGGCAAGAGTTTGTGACCGTTACTCAATCC-CATTGGCTATCTTCTCATCTTCAGAT   | 1 bp deletion(Out of frame)    | 4       |
| <b>gRNA3</b> |                                                                  |                                |         |
| <b>Wt</b>    | TCTTGAAGACGAAGACGCCGCCGAGGTTGTTTATCCTTCTTTCAGTGTATCCGTCATCACA    | Target sequence                |         |
|              | <u>Most frequent sequences</u>                                   | Type                           | Leads   |
| #2-2         | TCTTGAAGACGAAGACGCCGCCGAGGTTGTTTATCCTTCTTTCAGTGTATCCGTCATCACA    | Wild-type                      | 559,014 |
|              | TCTTGAAGACGAAGACGCCGCCGAGGTTGTTTATCCTTCTTTCAGTGTATCCGTCATCACA    | Wild-type(mismatch)            | 3,444   |
|              | TCTTGAAGACGAAGACGCCGCCGAGGTTGTTTATC---CTTCTTTCAGTGTATCCGTCATCACA | 3 bp deletion(In frame)        | 1,095   |
|              | TCTTGAAGACGAAGACGCCGCCGAGGTTG-TTATCCTTCTTTCAGTGTATCCGTCATCACA    | 1 bp deletion(Out of frame)    | 162     |
|              | TCTTGAAGACGAAGACGCCGCCGAGGTTGTTTATCCTTCTTTCAGTGTATCCGTCATCACA    | 3 bp insertion(In frame)       | 52      |
| #2-8         | TCTTGAAGACGAAGACGCCGCCGAGGTTGTTTATCCTTCTTTCAGTGTATCCGTCATCACA    | Wild-type                      | 597,019 |
|              | TCTTGAAGACGAAGACGCCGCCGAGGTTGTTTATCCTTCTTTCAGTGTATCCGTCATCACA    | Wild-type(mismatch)            | 3,600   |
|              | TCTTGAAGACGAAGACGCCGCCGAGGTTGTTTATC---CTTCTTTCAGTGTATCCGTCATCACA | 3 bp deletion(In frame)        | 1,211   |
|              | TCTTGAAGACGAAGACGCCGCCGAGGTTG-TTATCCTTCTTTCAGTGTATCCGTCATCACA    | 1 bp deletion(Out of frame)    | 101     |
|              | TCTTGAAGACGAAGACGCCGCCGAGGTTGTTTATCCTTCTTTCAGTGTATCCGTCATCACA    | 3 bp insertion(In frame)       | 49      |
| <b>gRNA4</b> |                                                                  |                                |         |
| <b>Wt</b>    | ATCCGTCATCACAACAGCATCTGGAAGTTACTGTGGCCGCTATTAAAGGGTACGCTAGTCCAG  | Target sequence                |         |
|              | <u>Most frequent sequences</u>                                   | Type                           | Leads   |
| #2-2         | ATCCGTCATCACAACAGCATCTGGAAGTTACTGTGGCCGCTATTAAAGGGTACGCTAGTCCAG  | Wild-type                      | 423,517 |
|              | ATCCGTCATCACAACAGCATCTGGAAGTTACTGTGGCCGCTA-TAAAGGGTACGCTAGTCCAG  | 1 bp deletion(Out of frame)    | 14      |
| #2-8         | ATCCGTCATCACAACAGCATCTGGAAGTTACTGTGGCCGCTATTAAAGGGTACGCTAGTCCAG  | Wild-type                      | 461,600 |
|              | ATCCGTCATCACAACAGCATCTGGAAGTTACTGTGGCC-CTATTAAAGGGTACGCTAGTCCAG  | 1 bp deletion(Out of frame)    | 15      |
|              | ATCCGTCATCACAACAGCATCTGGAAGTTACTGTGGCCGCTATTAAAGGGTACGCTAGTCCAG  | 1 bp insertion(Out of frame)   | 3       |

**Figure S5.** Genome-editing analysis of ‘transgene-free’ *BrVRN1* mutant GE1 lines by deep-sequencing. Wt, untransformed wild-type plants; Lanes #2-2 and #2-8, selected ‘transgene-free’ GE1 lines, respectively.

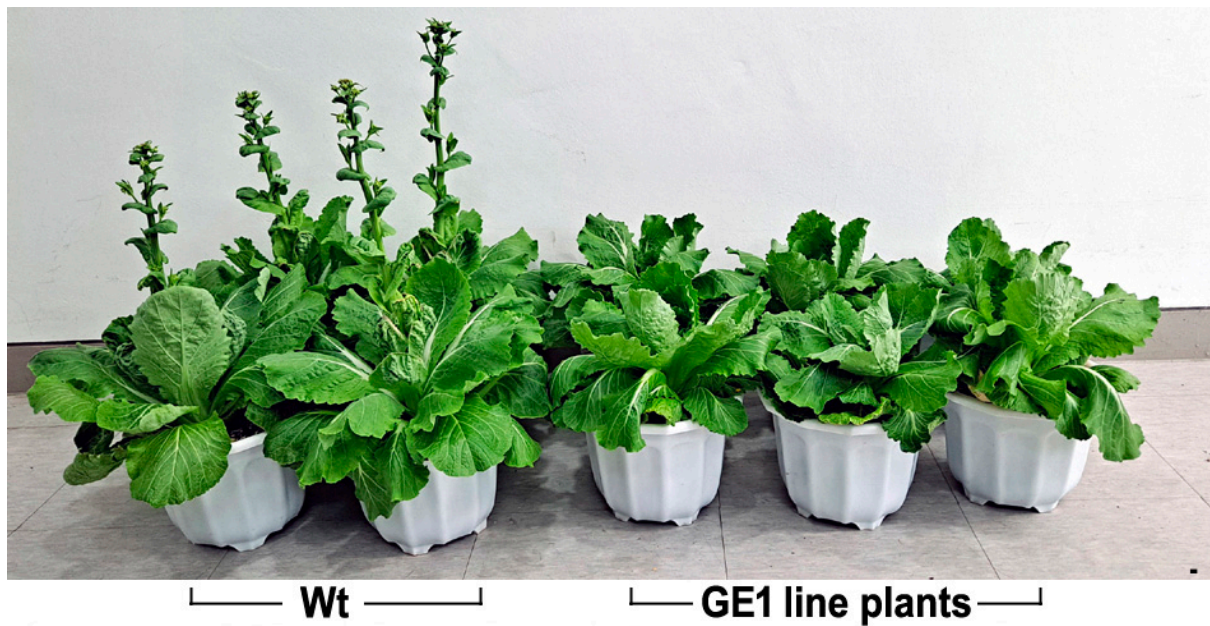

**Figure S6.** Flowering-time phenotype in *BrVRN1* mutant GE1 plants. Pictures were taken 20 days at 25°C after a 40-day exposure to 4°C. Wt, untransformed wild-type plants; GE1, gene-editing 1 mutant plants.

| #2-2 |                                     | <i>BrVRN1a</i> (Bra022376-target)  |                                       | <i>BrVRN1b</i> (Bra037544) |  |
|------|-------------------------------------|------------------------------------|---------------------------------------|----------------------------|--|
|      |                                     | PAM gRNA1                          | gRNA2 PAM                             | gRNA2 PAM                  |  |
| Wt   | CAGTACCTGAT-GGTACAGTTTGGCGTGTAGGACT | TTTGTGACCGTTACTCAATCCG-CATTGGGTATC | TTGTTGACCGTTACTCAATCCG-CATTGGTTACC    |                            |  |
| 1    | CAGTACCTGATAGGTACAGTTTGGCGTGTAGGACT | TTTGTGACCGTTACTCAATCCGCAATTGGGTATC | 1 TTGTTGACCGTTACTCAATCCGACATTGGTTACC  |                            |  |
| 2    | CAGTACCTGATAGGTACAGTTTGGCGTGTAGGACT | TTTGTGACCGTTACTCAATCCGCAATTGGGTATC | 2 TTGTTGACCGTTACTCAATCCGACATTGGTTACC  |                            |  |
| 3    | CAGTACCTGATAGGTACAGTTTGGCGTGTAGGACT | TTTGTGACCGTTACTCAATCCGCAATTGGGTATC | 3 TTGTTGACCGTTACTCAATCCGACATTGGTTACC  |                            |  |
| 4    | CAGTACCTGATAGGTACAGTTTGGCGTGTAGGACT | TTTGTGACCGTTACTCAATCCGCAATTGGGTATC | 4 TTGTTGACCGTTACTCAATCCGACATTGGTTACC  |                            |  |
| 5    | CAGTACCTGATAGGTACAGTTTGGCGTGTAGGACT | TTTGTGACCGTTACTCAATCCGCAATTGGGTATC | 5 TTGTTGACCGTTACTCAATCCGACATTGGTTACC  |                            |  |
| 6    | CAGTACCTGATAGGTACAGTTTGGCGTGTAGGACT | TTTGTGACCGTTACTCAATCCGCAATTGGGTATC | 6 TTGTTGACCGTTACTCAATCCGACATTGGTTACC  |                            |  |
| 7    | CAGTACCTGATAGGTACAGTTTGGCGTGTAGGACT | TTTGTGACCGTTACTCAATCCGCAATTGGGTATC | 7 TTGTTGACCGTTACTCAATCCGACATTGGTTACC  |                            |  |
| 8    | CAGTACCTGATAGGTACAGTTTGGCGTGTAGGACT | TTTGTGACCGTTACTCAATCCGCAATTGGGTATC | 8 TTGTTGACCGTTACTCAATCCGACATTGGTTACC  |                            |  |
| 9    | CAGTACCTGATAGGTACAGTTTGGCGTGTAGGACT | TTTGTGACCGTTACTCAATCCGCAATTGGGTATC | 9 TTGTTGACCGTTACTCAATCCGACATTGGTTACC  |                            |  |
| 10   | CAGTACCTGATAGGTACAGTTTGGCGTGTAGGACT | TTTGTGACCGTTACTCAATCCGCAATTGGGTATC | 10 TTGTTGACCGTTACTCAATCCGACATTGGTTACC |                            |  |
| #2-8 |                                     | <i>BrVRN1a</i> (Bra022376-target)  |                                       | <i>BrVRN1b</i> (Bra037544) |  |
|      |                                     | PAM gRNA1                          | gRNA2 PAM                             | gRNA2 PAM                  |  |
| Wt   | CAGTACCTGAT-GGTACAGTTTGGCGTGTAGGACT | TTTGTGACCGTTACTCAATCCG-CATTGGGTATC | Wt TTGTTGACCGTTACTCAATCCG-CATTGGTTACC |                            |  |
| 1    | CAGTACCTGATAGGTACAGTTTGGCGTGTAGGACT | TTTGTGACCGTTACTCAATCCGCAATTGGGTATC | 1 TTGTTGACCGTTACTCAATCCGACATTGGTTACC  |                            |  |
| 2    | CAGTACCTGATAGGTACAGTTTGGCGTGTAGGACT | TTTGTGACCGTTACTCAATCCGCAATTGGGTATC | 2 TTGTTGACCGTTACTCAATCCGACATTGGTTACC  |                            |  |
| 3    | CAGTACCTGATAGGTACAGTTTGGCGTGTAGGACT | TTTGTGACCGTTACTCAATCCGCAATTGGGTATC | 3 TTGTTGACCGTTACTCAATCCGACATTGGTTACC  |                            |  |
| 4    | CAGTACCTGATAGGTACAGTTTGGCGTGTAGGACT | TTTGTGACCGTTACTCAATCCGCAATTGGGTATC | 4 TTGTTGACCGTTACTCAATCCGACATTGGTTACC  |                            |  |
| 5    | CAGTACCTGATAGGTACAGTTTGGCGTGTAGGACT | TTTGTGACCGTTACTCAATCCGCAATTGGGTATC | 5 TTGTTGACCGTTACTCAATCCGACATTGGTTACC  |                            |  |
| 6    | CAGTACCTGATAGGTACAGTTTGGCGTGTAGGACT | TTTGTGACCGTTACTCAATCCGCAATTGGGTATC | 6 TTGTTGACCGTTACTCAATCCGACATTGGTTACC  |                            |  |
| 7    | CAGTACCTGATAGGTACAGTTTGGCGTGTAGGACT | TTTGTGACCGTTACTCAATCCGCAATTGGGTATC | 7 TTGTTGACCGTTACTCAATCCGACATTGGTTACC  |                            |  |
| 8    | CAGTACCTGATAGGTACAGTTTGGCGTGTAGGACT | TTTGTGACCGTTACTCAATCCGCAATTGGGTATC | 8 TTGTTGACCGTTACTCAATCCGACATTGGTTACC  |                            |  |
| 9    | CAGTACCTGATAGGTACAGTTTGGCGTGTAGGACT | TTTGTGACCGTTACTCAATCCGCAATTGGGTATC | 9 TTGTTGACCGTTACTCAATCCGACATTGGTTACC  |                            |  |
| 10   | CAGTACCTGATAGGTACAGTTTGGCGTGTAGGACT | TTTGTGACCGTTACTCAATCCGCAATTGGGTATC | 10 TTGTTGACCGTTACTCAATCCGACATTGGTTACC |                            |  |

**Figure S7.** Target gene mutations by the multiplex CRISPR/Cas9 system in the GE2 generation. The mutated DNA sequences of target regions are provided. Gene mutations are in red. Wt, untransformed wild-type plants; lanes 1 to 10, selected #2-2 and #2-8 GE2 mutant lines, respectively.



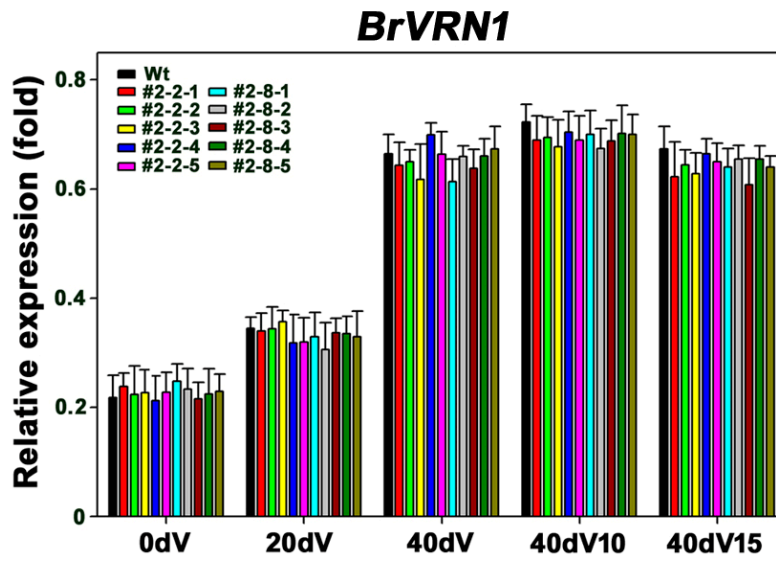

**Figure S8.** Expression patterns of *BrVRN1a* in ‘transgene-free’ *BrVRN1* mutant GE2 lines. 0dV, 20 day-old plants before cold treatment (4°C); 20dV, 20-day exposure to 4°C; 40dV, 40-day exposure to 4°C; 40dV10 and 40dV15, 10 days and 15 days at 25°C after a 40-day exposure to 4°C, respectively. Wt, untransformed wild-type plants; lanes #2-2-1 to #2-8-10, selected ‘transgene-free’ GE2 mutant lines, respectively.

**Table S1.** Features of *BrVRN1* genes used in this study.

| <i>Arabidopsis</i><br>gene | <i>B. rapa</i><br>Gene ID | <i>B. rapa</i><br>paralogs | Genomic sequence<br>length (bp) | Exon/intron structure |         | Coding<br>region (bp) | Protein<br>size (aa) | Coding sequence<br>identity with<br><i>AtVRN1</i> (%) | Amino acid<br>Sequence identity<br>with AtVRN1 (%) |
|----------------------------|---------------------------|----------------------------|---------------------------------|-----------------------|---------|-----------------------|----------------------|-------------------------------------------------------|----------------------------------------------------|
|                            |                           |                            |                                 | Exons                 | Introns |                       |                      |                                                       |                                                    |
| At3g18990                  | Bra022376                 | <i>BrVRN1a</i>             | 2865                            | 4                     | 3       | 1041                  | 346                  | 87.1                                                  | 90.9                                               |
|                            | Bra037544                 | <i>BrVRN1b</i>             | 3110                            | 4                     | 3       | 1029                  | 342                  | 90.1                                                  | 93.8                                               |
|                            | Bra001729                 | <i>BrVRN1c</i>             | 2706                            | 4                     | 3       | 990                   | 329                  | 86.2                                                  | 91.9                                               |

**Table S2.** Summary of *Brassica rapa* L. (v3.0) reference genome.

| Chr. #       | Chr. length (bp) | No. of Gene | Genelength (bp) | CDS length (bp) |
|--------------|------------------|-------------|-----------------|-----------------|
| SL4.0ch01    | 29,595,527       | 4,498       | 8,460,173       | 5,162,019       |
| SL4.0ch02    | 31,442,979       | 4,586       | 8,509,646       | 4,957,257       |
| SL4.0ch03    | 38,154,160       | 6,553       | 12,097,777      | 7,371,687       |
| SL4.0ch04    | 21,928,416       | 3,258       | 5,872,957       | 3,543,990       |
| SL4.0ch05    | 28,493,056       | 4,265       | 7,919,791       | 4,852,659       |
| SL4.0ch06    | 29,167,992       | 4,499       | 8,726,395       | 5,354,649       |
| SL4.0ch07    | 28,928,902       | 4,329       | 8,032,747       | 4,887,840       |
| SL4.0ch08    | 22,981,702       | 3,578       | 6,621,748       | 3,960,462       |
| SL4.0ch09    | 45,156,810       | 6,648       | 12,317,263      | 7,477,641       |
| SL4.0ch10    | 20,725,698       | 3,381       | 6,477,353       | 3,948,051       |
| Un-anchored* | 56,564,952       | 655         | 962,088         | 551,304         |
| Total        | 353,140,194      | 46,250      | 85,997,938      | 52,067,559      |

\* Un-anchored: Total length of 1,103 scaffolds.

**Table S3.** Statistics of target four-gRNA position on the reference v3 genome.

| <i>VRN</i> gene family<br>(version 1.5) | Reference gene ID and position(version 3.0) |      |            |            |        | gRNA position in reference V3 genome |            |            |                                 |
|-----------------------------------------|---------------------------------------------|------|------------|------------|--------|--------------------------------------|------------|------------|---------------------------------|
|                                         | VRN gene family                             | Chr. | Start      | End        | Strand | Target                               | Start      | End        | Sequence                        |
| Bra022376<br>( <i>BrVRN1a</i> -target)  | BraA05g028310.3C<br>(target)                | A05  | 21,149,298 | 21,151,462 | +      | gRNA1                                | 21,150,396 | 21,150,418 | CCTGATGGTCACGTTTGGCGTGT         |
|                                         |                                             |      |            |            |        | gRNA2                                | 21,150,480 | 21,150,502 | GACCGTTACTCAATCCGCAT <b>TGG</b> |
|                                         |                                             |      |            |            |        | gRNA3                                | 21,150,667 | 21,150,689 | CCGAGGTTGTTTATCCTTCTCT          |
|                                         |                                             |      |            |            |        | gRNA4                                | 21,150,717 | 21,150,739 | CCTGAAGTTACTGTGGCCGCTAT         |
| Bra037544<br>( <i>BrVRN1b</i> )         | BraA01g033970.3C                            | A01  | 23,266,355 | 21,151,462 | +      | gRNA1                                | 23,267,342 | 23,267,364 | CCTGATGGTCATGTTTGGCGTGT         |
|                                         |                                             |      |            |            |        | gRNA2                                | 23,267,426 | 23,267,448 | GACCGTTACTCAATCCGCAT <b>TGG</b> |
|                                         |                                             |      |            |            |        | gRNA3                                | -          | -          | -                               |
|                                         |                                             |      |            |            |        | gRNA4                                | -          | -          | -                               |
| Bra001729<br>( <i>BrVRN1c</i> )         | BraA03g038610.3C                            | A03  | 19,118,034 | 19,120,080 | -      | gRNA1                                | 19,119,053 | 19,119,075 | ACACGCCAAACGTGACCATC <b>AGG</b> |
|                                         |                                             |      |            |            |        | gRNA2                                | 19,118,966 | 19,118,988 | CCAATGCGGATGGAGTAACGGTC         |
|                                         |                                             |      |            |            |        | gRNA3                                | -          | -          | -                               |
|                                         |                                             |      |            |            |        | gRNA4                                | -          | -          | -                               |

\* Nucleotides in red represent PAM sequence



**Table S4.** CRISPR/Cas9-mediated targeted mutagenesis of *BrVRN1* in the T<sub>0</sub> generation.

| Line (T0) | Mutagenesis | Harvested seed | Deep seq. result |
|-----------|-------------|----------------|------------------|
| #1        | ○           | ○              | Figure S1        |
| #2        | ○           | ○              | Figure S1        |
| #3        | ○           | nh*            | -                |
| #4        | X           | -              | -                |
| #5        | X           | -              | -                |
| #6        | X           | -              | -                |
| #7        | ○           | ○              | Figure S1        |
| #8        | X           | -              | -                |
| #9        | ○           | nh             | -                |
| #10       | ○           | nh             | -                |
| #11       | X           | -              | -                |
| #12       | X           | -              | -                |
| #13       | ○           | nh             | -                |
| #14       | X           | -              | -                |
| #15       | X           | -              | -                |
| #16       | ○           | nh             | -                |
| #17       | ○           | nh             | -                |
| #18       | X           | -              | -                |
| #19       | ○           | nh             | -                |
| 19 lines  | 10 lines    | 3 lines        |                  |

\*nh, not harvested seed.

**Table S5.** Statistics of final trimmed whole genome resequencing data from ‘transgene-free’ *BrVRNI* mutant GE2 lines.

| Samples | No. of Reads  | Avg. read length | Total read length (bp) | Trimmed/Raw (%) <sup>*1</sup> | Coverage <sup>*2</sup> |
|---------|---------------|------------------|------------------------|-------------------------------|------------------------|
| WT      | 71,916,212    | 132.85           | 9,553,709,532          | 62.97%                        | ≈ 34.73X               |
|         | 71,916,212    | 101.40           | 7,292,004,106          | 48.06%                        |                        |
| #2-2-1  | 55,417,399    | 104.64           | 5,798,673,684          | 60.27%                        | ≈ 23.29X               |
|         | 55,417,399    | 99.19            | 5,496,769,711          | 57.13%                        |                        |
| #2-2-2  | 72,203,769    | 133.25           | 9,621,293,493          | 66.29%                        | ≈ 34.84X               |
|         | 72,203,769    | 100.79           | 7,277,522,731          | 50.14%                        |                        |
| #2-2-3  | 64,787,827    | 132.47           | 8,582,441,617          | 63.86%                        | ≈ 32.16X               |
|         | 64,787,827    | 108.30           | 7,016,449,712          | 52.21%                        |                        |
| #2-2-4  | 80,216,863    | 118.41           | 9,498,436,349          | 66.15%                        | ≈ 37.50X               |
|         | 80,216,863    | 108.31           | 8,688,530,929          | 60.51%                        |                        |
| #2-2-5  | 60,123,013    | 133.18           | 8,006,934,424          | 68.77%                        | ≈ 29.69X               |
|         | 60,123,013    | 106.29           | 6,390,623,762          | 54.89%                        |                        |
| #2-8-1  | 65,231,573    | 120.25           | 7,844,113,865          | 66.95%                        | ≈ 30.71X               |
|         | 65,231,573    | 108.10           | 7,051,522,995          | 60.18%                        |                        |
| #2-8-2  | 76,978,273    | 119.91           | 9,230,265,110          | 66.87%                        | ≈ 36.36X               |
|         | 76,978,273    | 109.20           | 8,406,353,048          | 60.90%                        |                        |
| #2-8-3  | 75,705,475    | 118.58           | 8,977,072,374          | 65.87%                        | ≈ 35.55X               |
|         | 75,705,475    | 109.18           | 8,265,781,363          | 60.65%                        |                        |
| #2-8-4  | 80,476,313    | 117.68           | 9,470,709,283          | 66.31%                        | ≈ 37.86X               |
|         | 80,476,313    | 110.50           | 8,892,492,747          | 62.26%                        |                        |
| #2-8-5  | 63,213,395    | 130.88           | 8,273,659,352          | 71.54%                        | ≈ 32.22X               |
|         | 63,213,395    | 116.32           | 7,353,265,160          | 63.58%                        |                        |
| Total   | 1,532,540,224 |                  | 176,988,625,347        |                               |                        |

\*1) Trimmed/Raw(%): (Total length of trimmed reads / Total length of raw reads)\*100

\*2) Coverage: Total read length of each sample/estimated genome size (485Mb)
